# Supplementary material
Source: PubMed Central journal article supplement (PMC4622381)
Supplement: DS_10.1177_1941738115607208_A1.pdf [file DS_10.1177_1941738115607208_A1.pdf]

## Appendix 1

**Table 1.** Commonly used surgical techniques for ulnar collateral ligament reconstruction

| Technique                | Ulna   | Humerus | Ulnar fixation                          | Humeral fixation                   | Graft configuration | Management of FP mass | Management of ulnar nerve  | Routine arthroscopy |
|--------------------------|--------|---------|-----------------------------------------|------------------------------------|---------------------|-----------------------|----------------------------|---------------------|
| <b>Jobe</b>              | Tunnel | Tunnel  | None                                    | Sutured to itself                  | Figure-of-8         | Transection           | Submuscular transposition  | No                  |
| <b>Modified Jobe</b>     | Tunnel | Tunnel  | None                                    | Sutured to itself                  | Figure-of-8         | Split                 | Based on symptoms          | No                  |
| <b>Docking</b>           | Tunnel | Socket  | None                                    | Sutured over bone bridge           | Triangle            | Split                 | Based on symptoms          | Yes                 |
| <b>Docking plus</b>      | Tunnel | Socket  | None                                    | Sutured and graft over bone bridge | Figure-of-8         | Split                 | Based on symptoms          | No                  |
| <b>DANE-TJ</b>           | Socket | Socket  | Interference screw                      | Docking over bone bridge           | Linear              | Split                 | Based on symptoms          | No                  |
| <b>Double Docking</b>    | Socket | Socket  | Suture over bone bridge                 | Endobutton                         | Linear              | Split                 | Based on symptoms          | No                  |
| <b>Hybrid</b>            | Tunnel | Anchor  | None                                    | Suture anchor, sutured to itself   | Triangle            | Split                 | Based on symptoms          | No                  |
| <b>ASMI modification</b> | Tunnel | Tunnel  | None                                    | Sutured to itself                  | Figure-of-8         | Split                 | Subcutaneous transposition | Yes                 |
| <b>Tension slide</b>     | Socket | NA      | Suspensory cortical, interference screw | NA                                 | NA                  | NA                    | NA                         | NA                  |
| <b>Bisuspensory</b>      | Socket | Socket  | Suspensory cortical                     | Suspensory cortical                | Linear              | NA                    | NA                         | NA                  |
| <b>Ziploop</b>           | Socket | Socket  | Suspensory cortical                     | Interference screw                 | Linear              | NA                    | NA                         | NA                  |

ASMI, American Sports Medicine Institute; DANE-TJ, David Altchek Neal ElAttrache Tommy

John; FP, flexor-pronator; NA, not applicable.

**Table 2.** Summary of outcomes of ulnar collateral ligament reconstruction in recent literature

| Author                       | No. MUCLR | No. MUCL Repair | Dates     | Mean Age, y (range) | Number of Males (%) | Sport                                                                     | Surgical Technique     | Graft Choice                                                   | Concomitant Procedures                                                                                                                | Arthroscopy Performed (%) | Mean Follow-Up | Outcomes                                                   | Mean Time to RTS, mo           | Complications                                                                                                     |
|------------------------------|-----------|-----------------|-----------|---------------------|---------------------|---------------------------------------------------------------------------|------------------------|----------------------------------------------------------------|---------------------------------------------------------------------------------------------------------------------------------------|---------------------------|----------------|------------------------------------------------------------|--------------------------------|-------------------------------------------------------------------------------------------------------------------|
| O'Brien et al <sup>49</sup>  | 3         | 0               | 2004-2009 | 20.3 (16-33)        | 31/33 (94)          | Baseball: 30<br>Javelin: 3                                                | Modified Jobe; Docking | Palmaris Auto: 24<br>Hamstring Auto: 5<br>Achilles Auto: 4     | 3 flexor-pronator tendon repairs, 2 loose body removals, 1 excision of olecranon spur, 1 ulnar nerve neurolysis without transposition | No                        | 3.7 y          | KJOC: 76<br>Returned to previous level of competition: 82% | Baseball: 10.4<br>Javelin: 9.5 | Subsequent surgery: 3                                                                                             |
| Jones et al <sup>33</sup>    | 55        | 0               | 2008-2010 | 17.6 (15-18)        | 51/55 (92.7)        | Baseball: 47<br>Gymnast: 3<br>Javelin: 5<br>All HS                        | Docking                | Palmaris Auto: 45<br>Gracilis Auto: 10                         | Transhumeral drilling for capitellar OCD: 2<br>PM olecranon osteophyte debridement: 2                                                 | 4/55 (7.3)                | 31 mo          | KJOC: 88 ± 6<br>Andrews-Timmerman: 83.6 ± 7.2              | 11.5<br>Range, 9-14            | Ulnar neuritis: 4                                                                                                 |
| Bowers et al <sup>6</sup>    | 21        | 0               | 2005-2007 | 20 (16-27)          | 21/21 (100)         | Baseball: 21<br>5 Pro, 11 College, 5 HS                                   | Modified Docking       | Not Specified                                                  | None listed                                                                                                                           | NA                        | 28 mo          | Conway: 90% excellent results                              | NA                             | None                                                                                                              |
| Dines et al <sup>18</sup>    | 10        | 0               | 2006-2009 | 18.5 (18-21)        | NA                  | Javelin: 10<br>5 College, 5 HS                                            | Docking                | Palmaris Auto: 9<br>Gracilis Auto: 1                           | None listed                                                                                                                           | NA                        | 28.9 mo        | Conway: 90% excellent results<br>Andrews-Timmerman: 97     | 15                             | None                                                                                                              |
| Cain et al <sup>8</sup>      | 1266      | 15              | 1988-2006 | 21.5 (14-59)        | 1253/1281 (98)      | Baseball: 1213<br>Javelin: 15<br>Football: 13<br>Softball: 9<br>Tennis: 7 | Modified Jobe          | Palmaris Auto: 935<br>Gracilis Auto: 294<br>Plantaris Auto: 30 | Done in 437 patients; primarily excision of PM olecranon osteophytes                                                                  | NA                        | 38.4 mo        | Returned to previous level of competition or higher: 83%   | 11.6<br>Range, 3-72            | Ulnar neuropraxia: 121<br>Failure: 9                                                                              |
| Dines et al <sup>16</sup>    | 22        | 0               | NA        | 20.1 (16-24)        | NA                  | Baseball: 20<br>1 Pro, 16 College, 3 HS<br>Hockey: 1<br>Football: 1       | DANE TJ                | Palmaris Auto: 12<br>Gracilis Auto: 10                         | PM olecranon osteophyte debridement: 3<br>Synovectomy and chondroplasty: 1                                                            | 3/22 (13.6)               | 35.9 mo        | Conway: 86% excellent results                              | NA                             | Ulnar neuritis: 2<br>Revision for lysis of adhesions: 2                                                           |
| Savoie et al <sup>57</sup>   | 116       | 0               | 2005-2009 | 20.4 (14-32)        | NA                  | Baseball, softball, javelin: 23<br>Pro, 28 College, 45 HS                 | Docking                | Hamstring Allo: 123                                            | None listed                                                                                                                           | "Most"                    | 39 mo          | Conway: 80% excellent results                              | 9.5<br>Range, 4.5-18           | Ulnar neuropathy: 3<br>Wound problems: 2<br>Medial humeral epicondyle fracture: 1<br>FP muscle and tendon tear: 1 |
| Hechtman et al <sup>27</sup> | 34        | 0               | 1997-2002 | 18.7 (15-23)        | 34/34 (100)         | Baseball: 34<br>20 College, 14 HS                                         | Hybrid                 | Palmaris Auto: 29<br>Plantaris Auto: 3<br>Achilles Auto: 2     | Olecranon osteophyte and loose body removal: 1                                                                                        | NA                        | 6.9 y          | Returned to previous level of competition or higher: 85%   | 10<br>Range: 7-13              | Ulnar neuropathy: 1                                                                                               |

Allo, allograft; Auto, autograft; FP, flexor-pronator; HS, high school; KJOC, Kerlan-Jobe Orthopaedic Clinic score; NA, not available; OCD, osteochondritis dissecans; PM, posteromedial; Pro, professional.
